# Supplementary material for: Evaluation of a Pilot Wellness Elective for Master of Public Health Students during the COVID-19 Pandemic
Source: MDPI journal article supplement (doi:10.3390/ijerph21050590), 2024-05-03

## **SUPPLEMENTARY**

**Table S1:** “Culture of Wellness” course deliverables

**Table S2:** Pre-post survey given to students immediately before and immediately after the “Culture of Wellness” course

**Table S3:** Personal Health Improvement Plan topics chosen by students in the 2020 course

**Table S4:** Perceived Stress Scale pre-course survey results

**Table S5:** SMART goals for each of the 6 team projects

**Figure S1:** Perceived stress pre-course survey results in 2019 versus 2020

**Figure S2:** Five-month post-course survey question on importance of strategies to the students’ personal wellness

**Figure S3:** Five-month post-course survey on confidence in ability to apply the strategies

**Figure S4:** Five-month post-course survey question on frequency of application of strategies

**Table S1: “Culture of Wellness” course deliverables**

| <b>Deliverable</b>                             | <b>Description</b>                                                                                                                                                                                                                                                                                                                  |
|------------------------------------------------|-------------------------------------------------------------------------------------------------------------------------------------------------------------------------------------------------------------------------------------------------------------------------------------------------------------------------------------|
| Pre-class readings and reflections             | Weekly written reflection provided an opportunity to display understanding and personal insight of course readings. Students were given a prompt to respond to with an expected paper length of 200-400 words, due before each session.                                                                                             |
| Class participation and professionalism        | Students were expected to fully participate in class discussions and complete individual and team activities. Each student was expected to adhere to a learning environment that was engaging and supportive.                                                                                                                       |
| Personal Health Improvement Plan (PHIP)        | While completing readings and participating in discussions on health challenges, students were expected to work independently to identify a personal health priority and establish a plan for improvement. The final project included a written reflection and a 10-minute in-class presentation.                                   |
| Culture of Wellbeing Team Project Presentation | Students collaborated within a small group of peers to advance community wellbeing. Using improvement process tools and evidence-based wellbeing strategies, teams planned and proposed a Culture of Wellbeing initiative that could be activated within the school community. The final project included a 10-minute presentation. |

**Table S2:** Pre-post survey given to students immediately before and immediately after the “Culture of Wellness” course

| Assessments                         | Survey Main Question                                                                                                               | Response: Strategies / Questions                                                                                                                                                                                                                               | Scale                                                                                       |
|-------------------------------------|------------------------------------------------------------------------------------------------------------------------------------|----------------------------------------------------------------------------------------------------------------------------------------------------------------------------------------------------------------------------------------------------------------|---------------------------------------------------------------------------------------------|
| <b>Part 1: Skills Assessment</b>    | <i>“To what degree are you confident in your ability to apply the following strategies to improve wellbeing?”</i>                  | <b>Strategies provided:</b><br>Mindfulness; self reflection, resilience, narrative writing, healthy eating, exercise, relationships, time management, leading change, emotional intelligence, prioritizing purpose, cognitive reframing, appreciative inquiry  | 1. Not at all<br>2. Minimally<br>3. Somewhat<br>4. Mostly<br>5. Completely                  |
| <b>Part 2: Wellbeing Assessment</b> |                                                                                                                                    |                                                                                                                                                                                                                                                                |                                                                                             |
| Quality of life                     | <i>“Please select the number that best describes your feelings during the past week, including today. How would you describe:”</i> | <i>“Your overall quality of life?”<br/>“Your overall mental (intellectual) wellbeing?”<br/>“Your overall physical wellbeing?”<br/>“Your overall emotional wellbeing?”<br/>“Your level of social activity?”<br/>“Your spiritual wellbeing?”</i>                 | Range from 1-10:<br>(1 = As bad as it can be; 10 = As good as it can be)                    |
| Perceived stress                    | <i>“In the last month, how often have you felt:”</i>                                                                               | <i>“That you were unable to control the important things in life?”<br/>“Confident about your ability to handle your personal problems?”<br/>“That things were going your way?”<br/>“Difficulties were piling up so high that you could not overcome them?”</i> | 1. Never<br>2. Almost never<br>3. Sometimes<br>4. Fairly often<br>5. Very often             |
| Burnout                             | <i>“Over the last month:”</i>                                                                                                      | <i>“Have you felt burned out from your work?”<br/>“To what degree have you felt burned out?”</i>                                                                                                                                                               | Yes or No<br><br>1. Not at all<br>2. Minimally<br>3. Somewhat<br>4. Mostly<br>5. Completely |

Mindfulness

*“Over the last month:”*

*“To what degree have you felt present in  
the moment?”*

1. Not at all
  2. Minimally
  3. Somewhat
  4. Mostly
  5. Completely
-

**Table S3:** Personal Health Improvement Plan topics chosen by students in the 2020 course

| PHIP Topic                      | Number of Students |
|---------------------------------|--------------------|
| Exercise                        | 6                  |
| Meditation                      | 4                  |
| Journaling/Writing/Reading      | 3                  |
| Sleep hygiene                   | 3                  |
| Getting outside/enjoying nature | 2                  |
| “Unplugging” from technology    | 2                  |
| Time management                 | 1                  |
| Increasing water consumption    | 1                  |

**Table S4:** Perceived Stress Scale pre-course survey results

| <b>Perceived Stress Scale<br/>Question (In the last month, how<br/>often have you felt...)<sup>1</sup></b> | <b>2019 mean (n=54)</b> | <b>2020 mean (n=19)</b> | <b>Percent Change</b> | <b>p-value</b> |
|------------------------------------------------------------------------------------------------------------|-------------------------|-------------------------|-----------------------|----------------|
| That you were unable to control<br>the important things in life?                                           | 3.01                    | 3.05                    | 1.33                  | 0.12           |
| Confident about your ability to<br>handle your personal problems?                                          | 3.82                    | 4.05                    | 6.02                  | 0.15           |
| That things were going your way?                                                                           | 3.11                    | 3.32                    | 6.75                  | 0.15           |
| Difficulties were piling up so high<br>that you could not overcome<br>them?                                | 3.48                    | 2.68                    | -22.99                | 0.17           |

<sup>1</sup>The scale ranges from “Never,” assigned a score of 1, to “Very often,” assigned a score of 5

**Table S5:** SMART goals for each of the 6 team projects

| Teams  | SMART Goal                                                                                                                                                                                                      |
|--------|-----------------------------------------------------------------------------------------------------------------------------------------------------------------------------------------------------------------|
| Team 1 | For the duration of Winter Term, students will schedule 30 mins of outdoor walking. They will gauge success by having completed the goal and then self-assessing their stress using the Perceived Stress Scale. |
| Team 2 | All students will journal using a self-reflection prompt for 10 minutes at the end of the last class of the day.                                                                                                |
| Team 3 | Participating students will consume the recommended amount of water daily, 0.75 ounces of water per pound of body weight, for one month.                                                                        |
| Team 4 | All students spend 15 cumulative minutes per day outside without any technology for the next 30 days.                                                                                                           |
| Team 5 | Students will participate in an optional five-minute mindfulness meditation prior to the start of our first morning lecture.                                                                                    |
| Team 6 | Students will free up 90 min of time each day for whatever they need by keeping a detailed time log and using the “R Principles” to reorganize life.                                                            |

**Figure S1:** Perceived stress pre-course survey results in 2019 versus 2020

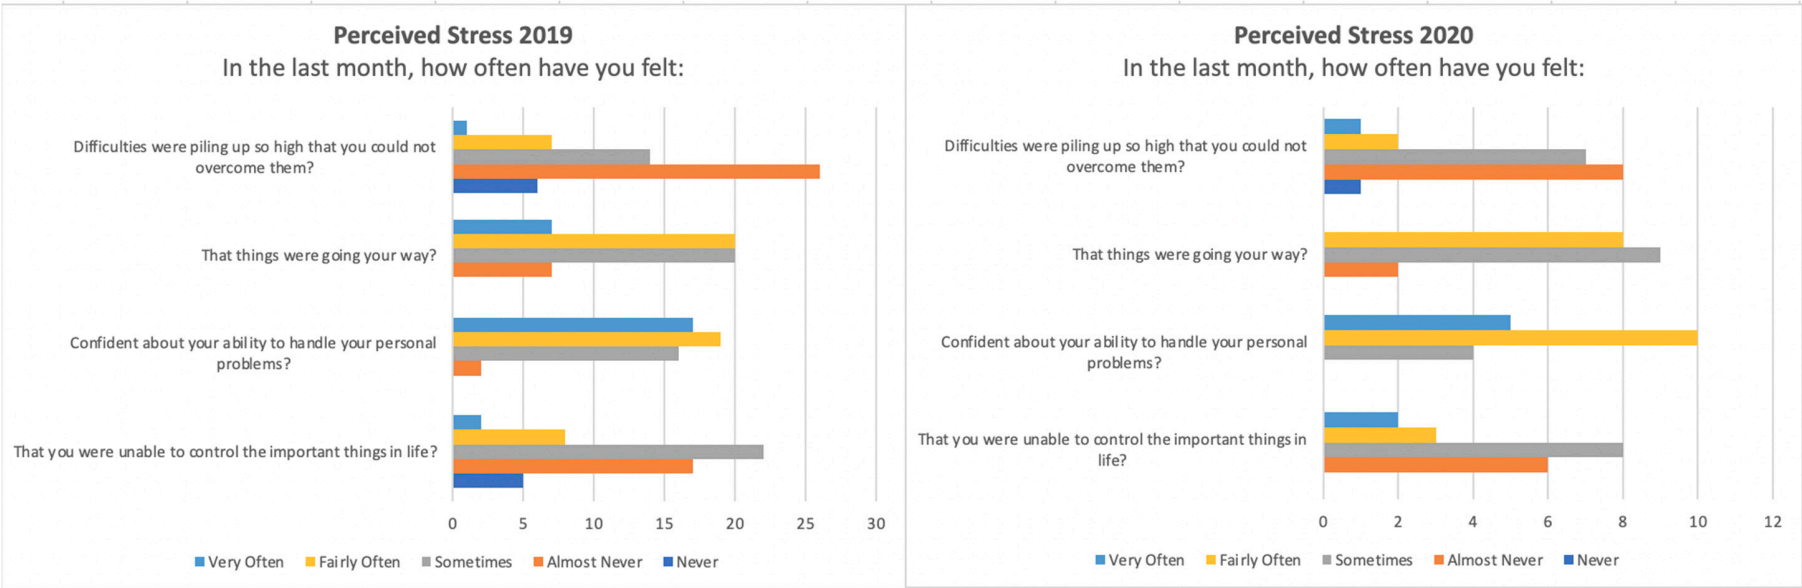

**Figure S2:** Five-month post-course survey question on importance of strategies to the students' personal wellness

How important are the wellbeing strategies learned in PH104 to your personal wellness currently?

14 responses

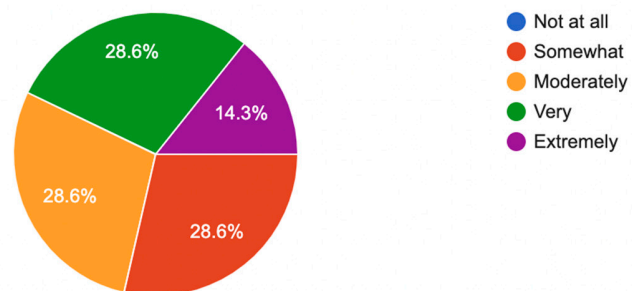

**Figure S3:** Five-month post-course survey on confidence in ability to apply the strategies

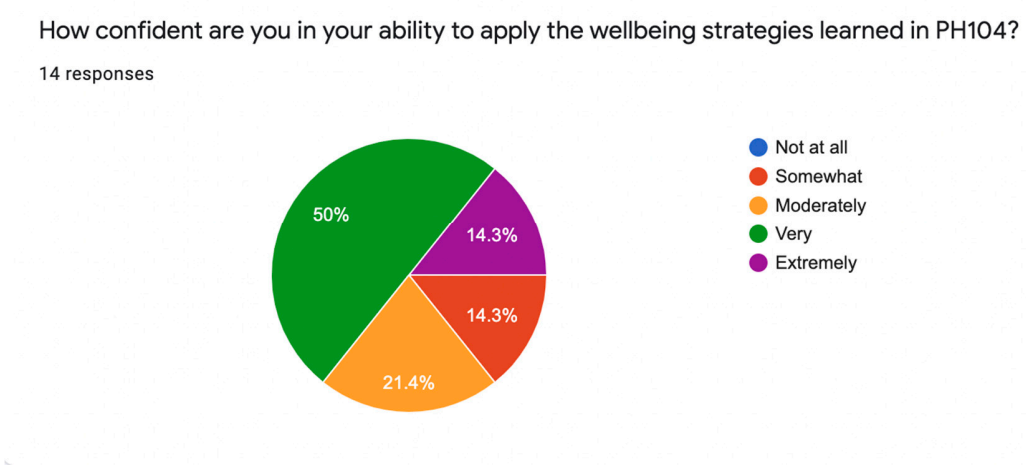

**Figure S4:** Five-month post-course survey question on frequency of application of strategies

Over the last 5 months, how frequently have you applied the strategies learned in PH104?

14 responses

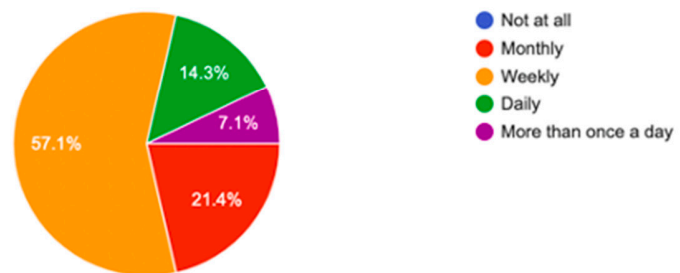

Supplement: s1 [file s1]
